# Supplementary material for: High-efficiency genome editing via 2A-coupled co-expression of fluorescent proteins and zinc finger nucleases or CRISPR/Cas9 nickase pairs
Source: PubMed Central journal article supplement — Nucleic Acids Res. 2014 Apr 21;42(10):e84. doi: 10.1093/nar/gku251 (PMC4041425; doi:10.1093/nar/gku251), 2014-04-21
Supplement: supp_gku251_gku317.pdf [file supp_gku251_gku317.pdf]

## **SUPPLEMENTARY DATA FOR:**

**High-efficiency genome editing via 2A-coupled co-expression of fluorescent proteins and zinc finger nucleases or CRISPR/Cas9 nickase pairs**

**Katarzyna Duda<sup>1</sup>, Lindsey A. Lonowski<sup>1</sup>, Michael Kofoed-Nielsen<sup>1</sup>, Adriana Ibarra<sup>1</sup>, Catherine M. Delay<sup>1</sup>, Qiaohua Kang<sup>2</sup>, Zhang Yang<sup>3</sup>, Shondra M. Pruett-Miller<sup>2</sup>, Eric P. Bennett<sup>3</sup>, Hans H. Wandall<sup>3</sup>, Gregory D. Davis<sup>2</sup>, Steen H. Hansen<sup>4</sup> and Morten Frödin<sup>1,5</sup>**

**<sup>1</sup>Biotech Research & Innovation Centre (BRIC) and Centre for Epigenetics, University of Copenhagen, Ole Maaløes vej 5, 2200 Copenhagen N, Denmark, <sup>2</sup>Sigma-Aldrich Biotechnology, Gene Regulation, 2909 Laclede Avenue, Saint Louis, MO, 63103, USA, <sup>3</sup>Copenhagen Center for Glycomics, Departments of Odontology and Cellular and Molecular Medicine, the Panum Institute 24.6.38, University of Copenhagen, Blegdamsvej 3, 2200 Copenhagen N, Denmark, <sup>4</sup>GI Cell Biology Research Laboratory, Boston Children's Hospital and Harvard Medical School, 300 Longwood Avenue, Boston, MA 02115, USA.**

**Supplementary Table S1.** DNA sequence of the zinc finger moieties of the *RSK2*, *RSK4* and *PRMT1* ZFNs.

*RSK2* ZFN<sub>L</sub>

5'-GGTACCCGCCGCTATGGCTGAGAGGCCCTTCCAGTGTCTGAATCTGCATGCGTAAGTT  
TGCCGACCGCTCCAACCGCATCAAGCATACCAAGATACACACGGGCGAGAAGCCCTTC  
CAGTGTCTGAATCTGCATGCGTAACTTCAGTCAGTCCGGCGCCCTGGCCCGCCACATCCG  
CACCCACACCGGCGAGAAGCCTTTTGCCTGTGACATTTGTGGGAGGAAATTTGCCACCT  
CCTCCAACCGCAAGACCCATACCAAGATACACACGGGCGGAGGCGGATCTCAGAAGC  
CCTTCCAGTGTCTGAATCTGCATGCGTAACTTCAGTCAGTCCTCCGACCTGTCCCGCCAC  
ATCCGCACCCACACCGGCGAGAAGCCTTTTGCCTGTGACATTTGTGGGAGGAAATTTG  
CCCAGTCCGGCTCCCTGACCCGCCATACCAAGATACACCTGCGGGGATCC-3'

*RSK2* ZFN<sub>R</sub>

5'-GGTACCCGCCGCTATGGCTGAGAGGCCCTTCCAGTGTCTGAATCTGCATGCGTAACTT  
CAGTCAGTCCGGCGCCCTGGCCCGCCACATCCGCACCCACACCGGCGAGAAGCCTTTT  
GCCTGTGACATTTGTGGGAGGAAATTTGCCCGCCTGGACAACCGCACCGCCCATACCA  
AGATACACACGGGCGGACAACGGCCCTTCCAGTGTCTGAATCTGCATGCGTAACTTCAG  
TCGCTCCGCGCCCTGTCCCGCCACATCCGCACCCACACCGGCGAGAAGCCTTTTGCCT  
GTGACATTTGTGGGAGGAAATTTGCCAGTCCGGCGACCTGACCCGCCATACCAAGAT  
ACACACGGGCGGAGGCGGATCTCAGAAGCCCTTCCAGTGTCTGAATCTGCATGCGTAACT  
TTCAGTACCTCCGGCTCCCTGTCCCGCCACATCCGCACCCACACCGGCGAGAAGCCTTT  
TGCCTGTGACATTTGTGGGAGGAAATTTGCCAGTCCGGCCACCTGTCCCGCCATACCA  
AGATACACCTGCGGGGATCC-3'

*RSK4* ZFN<sub>L</sub>

5'-GGTACCCGCCGCTATGGCTGAGAGGCCCTTCCAGTGTCTGAATCTGCATGCGTAACTT  
CAGTGAGCGCGGCACCCTGGCCCGCCACATCCGCACCCACACCGGCGAGAAGCCTTTT  
GCCTGTGACATTTGTGGGAGGAAATTTGCCAGTCCGGCCACCTGTCCCGCCATACCAA  
GATACACACGGGCGAGAAGCCCTTCCAGTGTCTGAATCTGCATGCGTAACTTTGCCAG  
TCCGGCGCCCTGGCCCGCCATACCAAGATACACACGCACCCGCGCGCCCGATCCCGA  
AGCCCTTCCAGTGTCTGAATCTGCATGCGTAACTTCAGTCGCTCCGACAACCTGTCCGAG  
CACATCCGCACCCACACCGGCGAGAAGCCTTTTGCCTGTGACATTTGTGGGAGGAAAT  
TTGCCAGCGCTCCAACCTGAAGGTGCATACCAAGATACACCTGCGGGGATCC-3'

*RSK4* ZFN<sub>R</sub>

5'-GGTACCCGCCGCTATGGCTGAGAGGCCCTTCCAGTGTCTGAATCTGCATGCGTAACTT  
TGCCCAGCGCTCCAACCTGGACTCCCATACCAAGATACACACGGGCGAGAAGCCCTTC  
CAGTGTCTGAATCTGCATGCGTAACTTCAGTCGTAGTGACGTCCTGAGCGCACACATCCG  
CACCCACACAGGCGAGAAGCCTTTTGCCTGTGACATTTGTGGGAAGAAATTTGCCGAC  
AGGAGCAACCGCATAAAGCATACCAAGATACACACGGGATCTCAGAAGCCCTTCCAGT  
GTCGAATCTGCATGCGTAACTTCAGTCAGTCCGGCGACCTGACCCGCCACATCCGCACC  
CACACCGGCGAGAAGCCTTTTGCCTGTGACATTTGTGGGAGGAAATTTGCCACCTCCG  
GCAACCTGACCCGCCATACCAAGATACACCTGCGGGGATCC-3'

*PRMT1* ZFN<sub>L</sub>

5'-GGTACCCGCCGCTATGGCTGAGAGGCCCTTCCAGTGTCTGAATCTGCATGCGTAACTT  
CAGTGACCGCTCCAACCTGTCCCGCCACATCCGCACCCACACCGGCGAGAAGCCTTTT

GCCTGTGACATTTGTGGGAGGAAATTTGCCCGCTCCGACGCCCTGACCCAGCATAACCA  
AGATACACACGGGCGGAGGCGGAAGCCAACGGCCCTTCCAGTGTCTGAATCTGCATGCG  
TAACTTCAGTACCTCCGGCAACCTGACCCGCCACATCCGCACCCACACCGGCGAGAAG  
CCTTTTGCCTGTGACATTTGTGGGAGGAAATTTGCCACCTCCGGCTCCCTGACCCGCCA  
TACCAAGATACACACGGGCGGAGAAGCCCTTCCAGTGTCTGAATCTGCATGCGTAAGTTT  
GCCACCTCCGGCCACCTGTCCCGCCATAACCAAGATACACCTGCGGGGATCC-3'

*PRMT1 ZFN*

5'-GGTACCCGCCGCTATGGCTGAGAGGCCCTTCCAGTGTCTGAATCTGCATGCGTAACTT  
CAGTCGCTCCGCCAACCTGTCCGTGCACATCCGCACCCACACaGGCGAGAAGCCTTTTG  
CCTGTGACATTTGTGGGAGGAAATTTGCCGACCGCGCCAACCTGTCCCGCCATAACCA  
GATACACACGGGCGGACAACGGCCCTTCCAGTGTCTGAATCTGCATGCGTAAAGTTTGCC  
CGCTCCGACAACCTGCGCGAGCATAACCAAGATACACACGGGCGGAGAAGCCCTTCCAGT  
GTCTGAATCTGCATGCGTAACTTTCAGTGTGAGCGCGGCACCCTGGCCCGCCACATCCGCAC  
CCACACCGGCGAGAAGCCTTTTGCCTGTGACATTTGTGGGAGGAAATTTGCCACCTCCT  
CCAACCGCAAGACCATAACCAAGATACACCTGCGGGGATCC-3'

**Supplementary Table S2.** Sequence of plasmid and ssODN donors. ZFN and gRNA target sites are underlined. Protospacer-adjacent motifs (PAMs) are indicated in red. Mutations to be introduced into the genomic loci are in bold. Of these, codon conversion mutations are lower case bold. Diagnostic restriction endonuclease sites resulting from the mutagenesis are indicated in italics. Other mutations introduced in ZFN and gRNA target sites aim to prevent re-targeting of the locus once the donor has been knocked in. The size of the donors is given as numbers of nucleotides in parentheses after the name of the donor, and ‘S’ or ‘AS’ stands for ssODN used as a sense or an antisense donor.

ssODN donors:

*RSK4* Cys443Val/BamHI (114, S)

5'-TTGGTGAAGTATATGAATTGAAGGAGGATATTGGTGTTGGATCCTACTCTGTTggtAA  
GCGATGCATACATGCTACTACCAACATGGAATTTGCAGTGAAGGTATTGTCTCTGA-3'

*RSK2* Cys436Val/Sfcl (122, S)

5'-GTAAAAGAAGATATTGGAGTTGGCTCCTACTCTGTAgttAAGAGATGTATTCATAAAG  
CCACAAACATGGAGTTTGCTGTGAAGGTCAATTTTTTTTATTTAAAATGCAATTCATAC  
AGTTC-3'

*PRMT1* ScaI (75, S)

5'-GGCTACTGCCTCTTCTACGAGTCCATGCTCAACACAGTACTCTATGCCCGGGACAAG  
TGGCTGGTGAGGCCCCAG-3'

*EMX1* gRNA 1/2 EcoRV (119, AS)

5'-CCTGGCCAGCAGCAAGCAGCACTCTGCCCTCGTGGGTTTCTGGATCCCCACCCTAGT  
CATTGGAGGTGACGTCGATATCTTCCCCATTGGCCTGCTTCGTGGCAATGCGCCACCGG  
TTG-3'

*EMX1* gRNA 1/3 EcoRV (104, AS)

5'-GCAGCACTCTGCCCTCGTGGGTTTGTGGTTGCCACCCTAGTCATTAGATGTCACGT  
CGATATCTTCCCCATTGGCCTGCTTCGTGGCAATGCGCCACCGGTTG-3'

Plasmid donor:

*RSK2* Cys436Val/BamHI (1680)

5'-CATGGATGTCTCATATCAGTATAGCCAAGGGCAGCACAACCTTTCCTCAGCCTGTTTA  
TGGAATCAGTAAGTTGCTGTTTCATCATCTACTGTGTGTTATTAGTCCCTAACCCATGAC  
GAGCTTCTTTAGCATAAGTTGTGTAAGGCTATGACTTCAGGGTGAAGAAAGGAGGGAG  
TGGCTACTGAAAGTCCAAAATGGCGATAACAGGTATTGCTTGCAAATACATTATTTTA  
TTAATCTTCACCATTACCCTCTGAGAAAATACAGGCTCAAAGTTACATAGCCTGTAAG

TGGTGTACCTGAGACAAGAATTCAGATATTCTAATTCTGAATCCTCCTAAATCCTTTCC  
TTCTATACCATAGGTTTCAAACCTTCTCATTGCAAAGGTACTTGAAAACCTATAGCCGA  
CTGGGGACTGGAATAAGGCTGAATCACAGACAAAGATGTAGGCCCATATCAAGTAGC  
TCTGCTTTTTCTGTTGTGCAAATTCAATTTTTGTTTGTAAACATAAGCTTTTTTAAGTCAT  
ATTTCTTGCTGTACACTTCATTGTAAACACTTTCAAATCACTTGTTTGTAGAATAATAA  
GTACTATAAAGATGTATTTTTATTCTTATTCATTTATATGTAGGGCATCAACAATGCAT  
GCTGAGTAACATACTTCCCTATTATAAAATGCACTAAAGGCATTATGGGACTCTTCACC  
AATTTATAATTTTTGTAGCAGTTACACAGGAACAGTATTCAGTTTACTGATGGATATG  
AAGTAAAAGAAGATATTGGAGTTGGATCCTACTCTGTTgttAAGAGATGTATACATAAA  
GCAACAAACATGGAATTTGCTGTGAAGGTAAATTTTTTTTATTTAAAATGCAATTCATA  
CAGTTCTTGTTTCATGCATGTCAGTACCAGTTAAAAATTACTCCCCTTGTTGTTAAAA  
GTGCCTTTTTGTTATAAAAAAGTTAAATATCTGGCTAGTGATCTTCAGAGATCTTAATCT  
AGAACCCTGTGAGCTAAAGGTAAGGTGGTTATATATCTAGTTTTCCAGAGCAGTAGC  
AGTTTACACCTCAAGTGATTTTTTTTTCTTTTTTACCTCAAGTGATTTTTAAAGTATCTTT  
TACTCTGAGAAGTCCCCATTTTATGCTCAGGGTGTGAGCAAATTCCTCAAATTTGTGT  
GCAAATTTTGTATGTTTACATCTTCTCTGGCAAAAAGTTCATACCTTTCTTTGCATCTA  
AAAGGATCTGGGAACATAATGAATAAAAACCACTATCATAAAATTCGTTATCATTGGCT  
GTTTTAATTTTCATCAAGTATCCTAAGACAGAATTTTCTAAGCCAAAAACCAAGGAACCT  
AGCTCTACGATAAAGTTTGAATTTCAAACCTTTAGTCGTAAGTGAACAAGCACTATGTT  
CAAGTCTCTTTTCACTTCTTGGAATAGTAACCTCTGCTCTCCAATCTCAAGCAATTCAA  
ACAATGTCTAAAGCTTTCAACTTGTTTGAACCTTAGGACTGGTTTATAAATATACATAG  
CTCATGTTTAGAGAGATAGTGACATTAGTTGTTATCACTCTTCTAAACTTAGATGTAAC  
TGCTTTAAAGTCGTCAGTGTCTATAGGGCTTTCTGTCAGATAGAAGGATGAACCATAAA  
AATACATTTAATTTGCTTCATTGGAAGGA-3'

**Supplementary Table S3.** gRNA target site sequences.

| Target site | Gene         | Target sequence 5' to 3' | PAM 5' to 3' | Target strand |
|-------------|--------------|--------------------------|--------------|---------------|
| 1*          | <i>EMXI</i>  | GACATCGATGTCCTCCCAT      | TGG          | -             |
| 2†          | <i>EMXI</i>  | GGGCAACCACAAACCCACGA     | GGG          | +             |
| 3‡          | <i>EMXI</i>  | GTCACCTCCAATGACTAGGG     | TGG          | +             |
|             | <i>KRAS</i>  | TAGTTGGAGCTGGTGGCGT      | AGG          | +             |
| §           | <i>VEGFA</i> | GACCCCTCCTCCCGCCTC       | CGG          | -             |

\**EMXI* target site 20 in reference (12).

†*EMXI* target site 22 in reference (12).

‡*EMXI* target site 21 in reference (12).

§*VEGFA* target site 2 in reference (36).

**Supplementary Table S4.** Sequence of QuickChange primers used to generate Cas9-D10A nickase mutant and to swap *EMXI* gRNA target sequences into pCMV-Cas9-GFP.

| Gene        | Primer sequence (the sense sequence is shown). For the gRNA swapping primers this means that the U6 promoter is located upstream of the gRNA, given in red. The sequences that anneal to pCMV-Cas9-GFP are underlined. Diagnostic restriction enzyme sites are in italics | Introduced mutation/gRNA | Diagnostic QuickChange restriction enzyme site |
|-------------|---------------------------------------------------------------------------------------------------------------------------------------------------------------------------------------------------------------------------------------------------------------------------|--------------------------|------------------------------------------------|
| Cas9        | GACAAGAAGTACAGCATCGGCC <i>TGGCCATCGGCACCAACTCTGTGGGCTG</i>                                                                                                                                                                                                                | D10A                     | MscI                                           |
| <i>EMXI</i> | <u>CTTGTGAAAGGACGAAACACCG</u> <i>GACATCGATGTCCTCCCAT</i> <u>GTTTGTAGAGCTAGAAATAGCAAGTTAA</u>                                                                                                                                                                              | gRNA 1*                  | ClaI                                           |
| <i>EMXI</i> | <u>CTTGTGAAAGGACGAAACACCG</u> <i>GGCAACCACAAACCCACGA</i> <u>GTTTGTAGAGCTAGAAATAGCAAGTTAA</u>                                                                                                                                                                              | gRNA 2†                  | BssSI                                          |
| <i>EMXI</i> | <u>CTTGTGAAAGGACGAAACACCG</u> <i>GTCACCTCCAATGACTAGGG</i> <u>GTTTGTAGAGCTAGAAATAGCAAGTTAA</u>                                                                                                                                                                             | gRNA 3‡                  | AgeI                                           |

\**EMXI* target site 20 in reference (12).

†*EMXI* target site 22 in reference (12).

‡*EMXI* target site 21 in reference (12).

**Supplementary Table S5.** Primers, PCR conditions, diagnostic RFLP sites and diagnostic fragment sizes for RFLP and CEL-I assays. Primers used for sequencing of PCR products are in bold.

| Target                              | Forward primer                  | Reverse primer                     | Annealing temp (°C) | PCR additives                            | PCR product size (bp) | Diagnostic RFLP site | Diagnostic fragment sizes (bp)* |
|-------------------------------------|---------------------------------|------------------------------------|---------------------|------------------------------------------|-----------------------|----------------------|---------------------------------|
| <b>ZFN on-target analysis</b>       |                                 |                                    |                     |                                          |                       |                      |                                 |
| <i>PRMT1</i>                        | TAGAAGGGTTCATGGCTTCTGC          | GCTACGGATTTCCTGTTCTAC<br>G         | 62                  | 1.6 mM MgCl <sub>2</sub>                 | 483                   | ScaI                 | 251+232                         |
| <i>RSK2</i><br>(with ssODN donor)   | CCTTCTATACCATAGGTTTCAAA<br>CTTC | ATGGAGGCAAGACACATCCT               | 61                  | 1.6 mM MgCl <sub>2</sub>                 | 1510                  | SfiI                 | (55+244)†<br>+398+813           |
| <i>RSK2</i><br>(with plasmid donor) | CCTTCTATACCATAGGTTTCAAA<br>CTTC | ATGGAGGCAAGACACATCCT               | 61                  | 1.6 mM MgCl <sub>2</sub>                 | 1510                  | BamHI                | 1068 + 442                      |
| <i>RSK4</i>                         | ATGTAAGCAATGAGGATGCA<br>G       | AACATTATCTCTATTCTACTG<br>AAATTGTAC | 60                  | 1.6 mM MgCl <sub>2</sub>                 | 1207                  | BamHI                | 840 + 367                       |
| <b>ZFN off-target analysis</b>      |                                 |                                    |                     |                                          |                       |                      |                                 |
| <i>RSK2</i>                         | AATTTGCTGACACCCTGAGC            | CCAAAATGGCGATAACAGGT               | 63                  | 1.6 mM MgCl <sub>2</sub>                 | 977                   | -                    | 333 + 644                       |
| <i>RSK2</i><br>off-target 1         | TCTTCTGAAGGGTCTCGCTTAC          | TGCTTTATTATGTTGCTGTGG              | 63                  | 1.6 mM MgCl <sub>2</sub>                 | 833                   | -                    | 292 + 541                       |
| <i>RSK2</i><br>off-target 2         | TTCTTCTCTGCAAAATTCTA            | <b>TCTTCTCTCTTGGTCCCTCT</b><br>G   | 62                  | 1 M betaine,<br>1.6 mM MgCl <sub>2</sub> | 620                   | -                    | 134 + 486                       |
| <i>RSK2</i><br>off-target 3         | CGTAACCGCAGTCGTATCCA            | TGACGTTGTCATGCACCAGA               | 62                  | 0.8 mM MgCl <sub>2</sub>                 | 976                   | -                    | 199 + 777                       |
| <i>RSK2</i><br>off-target 4         | TCAGTGTGGGAAGGACTTGC            | GAGAACCAGAGGAGGCAGTG               | 62                  | 1 M betaine,<br>1.6 mM MgCl <sub>2</sub> | 621                   | -                    | 289 + 332                       |
| <i>RSK2</i><br>off-target 5         | ATGTTGGCAGAAGGGATTCTA           | AATTAGCAAAAGCATCACAGC<br>A         | 62                  | 1.6 mM MgCl <sub>2</sub>                 | 1163                  | -                    | 474 + 689                       |
| <i>RSK2</i><br>off-target 6         | TGCAACCATACAGAGCTCCT            | TGTTGTCCCATGAAAGCAGC               | 63                  | 1.6 mM MgCl <sub>2</sub>                 | 692                   | -                    | 204 + 488                       |
| <i>RSK2</i><br>off-target 7         | TGATGAGCGAGACCTGTCTAAA          | CTAAGCTTGTTCCTGCGACT               | 62                  | 1.6 mM MgCl <sub>2</sub>                 | 745                   | -                    | 124 + 621                       |
| <i>RSK2</i><br>off-target 8         | GTGGTGGGTGAAAGATTAGCTC          | TTTCTCAGTTGAGTGGGGAA<br>T          | 62                  | 1.6 mM MgCl <sub>2</sub>                 | 827                   | -                    | 212 + 615                       |
| <i>RSK2</i><br>off-target 9         | ACAGTTCACATGCTTTGCTCAT          | CTAGACCTCTCTGGCCTGTA<br>A          | 62                  | 1.6 mM MgCl <sub>2</sub>                 | 641                   | -                    | 130 + 511                       |
| <i>RSK2</i><br>off-target 10        | AGGAAGCAAGTTGTCAGGAGAG          | CTGAGGATGTACGAGCACAGA<br>C         | 62                  | 1M betaine,<br>1.6 mM MgCl <sub>2</sub>  | 1077                  | -                    | 327 + 750                       |
| <i>RSK4</i>                         | TCTTCTGAAGGGTCTCGCTTAC          | TGCTTTATTATGTTGCTGTGG              | 63                  | 1.6 mM MgCl <sub>2</sub>                 | 833                   | -                    | 265 + 568                       |
| <i>RSK4</i><br>off-target 1         | AATTTGCTGACACCCTGAGC            | CCAAAATGGCGATAACAGGT               | 63                  | 1.6 mM MgCl <sub>2</sub>                 | 977                   | -                    | 358 + 619                       |
| <i>RSK4</i><br>off-target 2         | CCAGTTGCCGTCCATTAGGT            | CAATGTTGATGCCGGTGGTG               | 62                  | 1M betaine,<br>1.6 mM MgCl <sub>2</sub>  | 831                   | -                    | 283 + 548                       |
| <i>RSK4</i><br>off-target 3         | TGAATCACCAACAAGCCAGTG           | <b>CGTTCAAATGGCACTCCACC</b>        | 63                  | 1.6 mM MgCl <sub>2</sub>                 | 928                   | -                    | 317 + 611                       |
| <i>RSK4</i>                         | CAGCAAATTGCCAAGCAGTA            | TTCTGAAAGGGTGGGATCTG               | 62                  | 1.6 mM                                   | 822                   | -                    | 327 + 485                       |

|                                               |                        |                            |    |                                       |      |       |           |
|-----------------------------------------------|------------------------|----------------------------|----|---------------------------------------|------|-------|-----------|
| <b>off-target 4</b>                           |                        |                            |    | MgCl <sub>2</sub>                     |      |       |           |
| <b><i>RSK4</i> off-target 5</b>               | ACAAGGTCCTGGCATAGTG    | ATTGGGGCCCATTCTAATTC       | 62 | 1 M betaine, 1.6 mM MgCl <sub>2</sub> | 1132 | -     | 293 + 839 |
| <b><i>RSK4</i> off-target 6</b>               | CTGCACATCCAACCTGCTATCG | CTCTGCTTCCCTTTGGTTGA       | 62 | 1.6 mM MgCl <sub>2</sub>              | 631  | -     | 286 + 345 |
| <b><i>RSK4</i> off-target 7</b>               | AGCTCTGGCTCTAGCAAACG   | GTGCTCTTGGGAAAAGCAAG       | 62 | 1M betaine, 1.6 mM MgCl <sub>2</sub>  | 1146 | -     | 445 + 701 |
| <b><i>RSK4</i> off-target 8</b>               | CAATGGTGACCCGAAGTTCT   | ATGCCTGCATGGGGTTAATA       | 62 | 1.6 mM MgCl <sub>2</sub>              | 1151 | -     | 558 + 593 |
| <b><i>RSK4</i> off-target 9</b>               | GCTTATCGACACCAGCCAGT   | AGGTCTTATGGCCACAACG        | 63 | 1.6 mM MgCl <sub>2</sub>              | 1225 | -     | 598 + 627 |
| <b><i>RSK4</i> off-target 10</b>              | AGCCCATCTTTTCTCACACAGT | CTCTGCTCAGGTGTTTGTGAC      | 62 | 1M betaine, 1.6 mM MgCl <sub>2</sub>  | 1103 | -     | 350 + 753 |
| <b>CRISPR/Cas9 on-target analysis</b>         |                        |                            |    |                                       |      |       |           |
| <b><i>EMXI</i></b>                            | CCATCCCCTTCTGTGAATGT   | GGAGATTGGAGACACGGAGA       | 62 | 1M betaine, 1.6mM MgCl <sub>2</sub>   | 639  | EcoRV | 302 + 337 |
| <b><i>EMXI</i> (for gRNA targets 1 and 2)</b> | CCATCCCCTTCTGTGAATGT   | GGAGATTGGAGACACGGAGA       | 62 | 1M betaine, 1.6mM MgCl <sub>2</sub>   | 639  | -     | 265 + 374 |
| <b><i>EMXI</i> (for gRNA targets 1 and 3)</b> | CCATCCCCTTCTGTGAATGT   | GGAGATTGGAGACACGGAGA       | 62 | 1M betaine, 1.6 mM MgCl <sub>2</sub>  | 639  | -     | 286 + 353 |
| <b><i>VEGFA</i>‡</b>                          | CAAAGTGAGTGACCTGCTTTTG | CAGCAGAAAGTTCATGGTTTC<br>G | 65 | 1M betaine, 1.6 mM MgCl <sub>2</sub>  | 640  | -     | 203 + 437 |
| <b>CRISPR/Cas9 off-target analysis</b>        |                        |                            |    |                                       |      |       |           |
| <b><i>VEGFA</i> off-target 1§</b>             | AAGGGGCTGCTGGGTAGGAC   | CGTGATTTCGAGTTCCTGGCA      | 64 | 1M betaine, 1.6 mM MgCl <sub>2</sub>  | 197  | -     | 78 + 119  |
| <b><i>VEGFA</i> off-target 2§§</b>            | CCCATGAGGGGTTTGTAGTGC  | TGAAGATGGCAGTTTGGGG        | 62 | 1M betaine, 1.6 mM MgCl <sub>2</sub>  | 285  | -     | 74 + 211  |

\*For CEL-I analyses, the diagnostic fragment sizes may vary slightly depending on the mutagenesis outcome.

†Within the parentheses are shown non-diagnostic RFLP fragments common to both wild-type and mutant PCR products.

‡ *VEGFA* gRNA target site 2 in reference (36).

§ *VEGFA* off-target 6 for gRNA target site 2 in reference (36).

§§ *VEGFA* off-target 17 for gRNA target site 2 in reference (36).



**Supplementary Table S6.** Primary chromosomal location and gene copy number of the major genes targeted in this study.

| <b>Gene</b>    | <b>Chromosomal location</b>  | <b>Copy number</b> |
|----------------|------------------------------|--------------------|
| <b>K562</b>    |                              |                    |
| <i>RSK2</i>    | ChrX: 20,168,029-20,285,523  | 2 <sup>*†</sup>    |
| <i>RSK4</i>    | ChrX: 83,318,984-83,442,933  | 2 <sup>*†</sup>    |
| <i>VEGFA</i>   | Chr6: 43,737,921-43,754,224  | 4 <sup>*†</sup>    |
| <i>EMX1</i>    | Chr2: 73,143,389-73,162,020  | 3 <sup>*†</sup>    |
| <i>PRMT1</i>   | Chr19: 50,179,043-50,192,286 | 3 <sup>*†</sup>    |
| <b>Jurkat</b>  |                              |                    |
| <i>RSK2</i>    | ChrX: 20,168,029-20,285,523  | 3 <sup>*</sup>     |
| <i>RSK4</i>    | ChrX: 83,318,984-83,442,933  | 3 <sup>*</sup>     |
| <b>MCF-10A</b> |                              |                    |
| <i>RSK2</i>    | ChrX: 20,168,029-20,285,523  | 2 <sup>‡</sup>     |

\* The data was obtained experimentally by analysis of genomic DNA from the indicated cell lines using a CytoScan HD array from Affymetrix, as described in Materials and Methods.

†The data was independently obtained by the Wellcome Trust Sanger Institute Cancer Genome Project (<http://www.sanger.ac.uk/genetics/CGP>).

‡The data was obtained from reference (34).

# Supplementary Figure S1

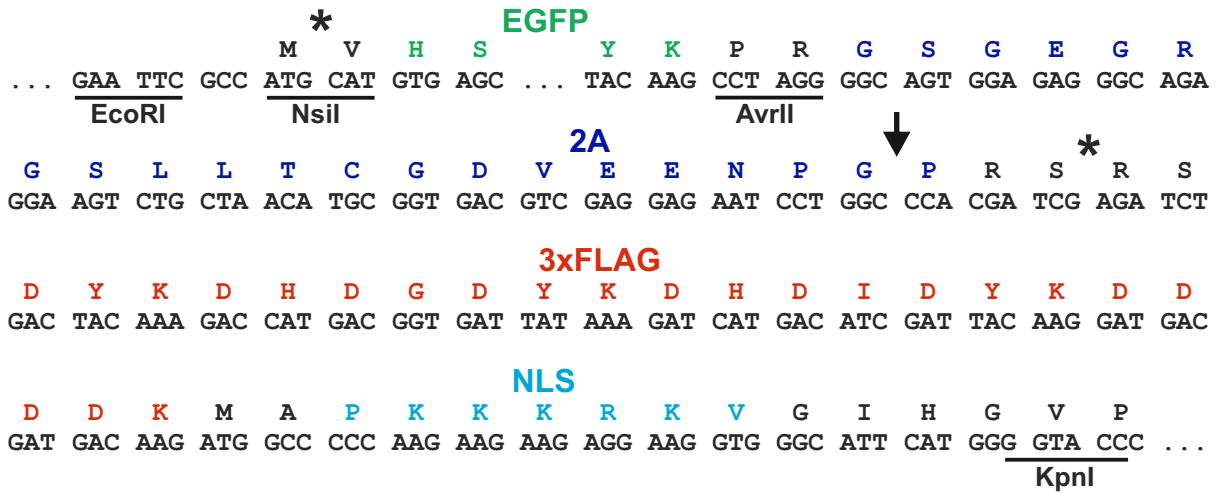

**Supplementary Figure S1. Sequence introduced into pZFN to generate pFluo-2A-ZFN.** Nucleotide and amino acid sequence of pFluo-2A-ZFN between the EcoRI and KpnI sites indicated in the schematic of pFluo-2A-ZFN given in Figure 1A. The sequence introduced in pZFN, the standard CompoZr ZFN expression construct, in order to generate pFluo-2A-ZFN is located between the two asterisks. The arrow in the 2A sequence indicates the position of translational skipping, which leaves the ZFN modified only by a Pro residue from the 2A peptide.

# Supplementary Figure S2

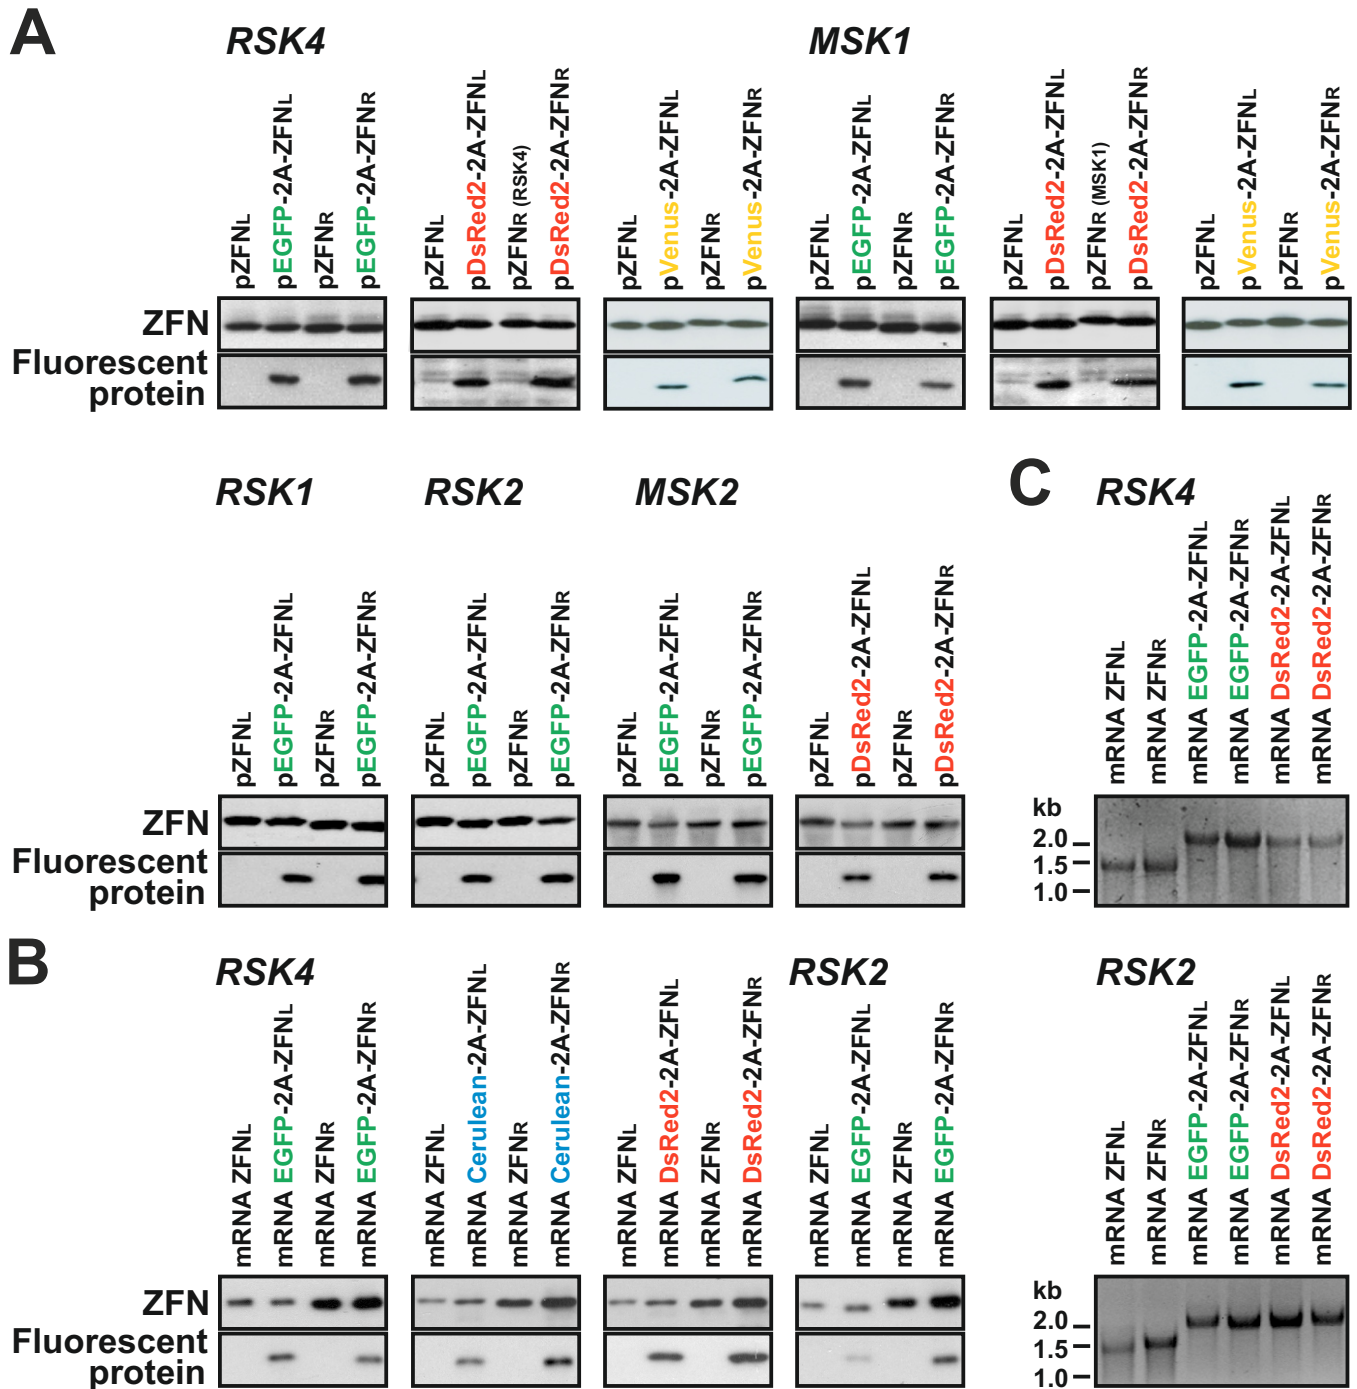

**Supplementary Figure S2. Fluo-2A-ZFN constructs express fluorescent proteins and ZFNs as separate entities and at normal levels.** (A) HCT116 cells were transfected with pFluo-2A-ZFN encoding various fluorescent proteins and ZFNs for various genes or transfected with pZFN for the same genes. (B) HCT116 cells were nucleofected with mRNA transcribed *in vitro* from pFluo-2A-ZFN encoding various fluorescent proteins and ZFNs for various genes or from pZFN for the same genes. For (A,B), the cells were lysed two d post-transfection and equal aliquots of the cell lysates were subjected to immunoblotting with antibodies against the FLAG epitope tag of the ZFNs or against the relevant fluorescent protein. (C) Equal aliquots of various *in vitro* mRNA transcription reactions using pFluo-2A-ZFN or pZFN as template were analysed for production yields by gel electrophoresis. In all of the above panels ZFNl and ZFNr denote left and right ZFN, respectively, of the ZFN pair. The experiments were repeated 3 times with similar results.

# Supplementary Figure S3

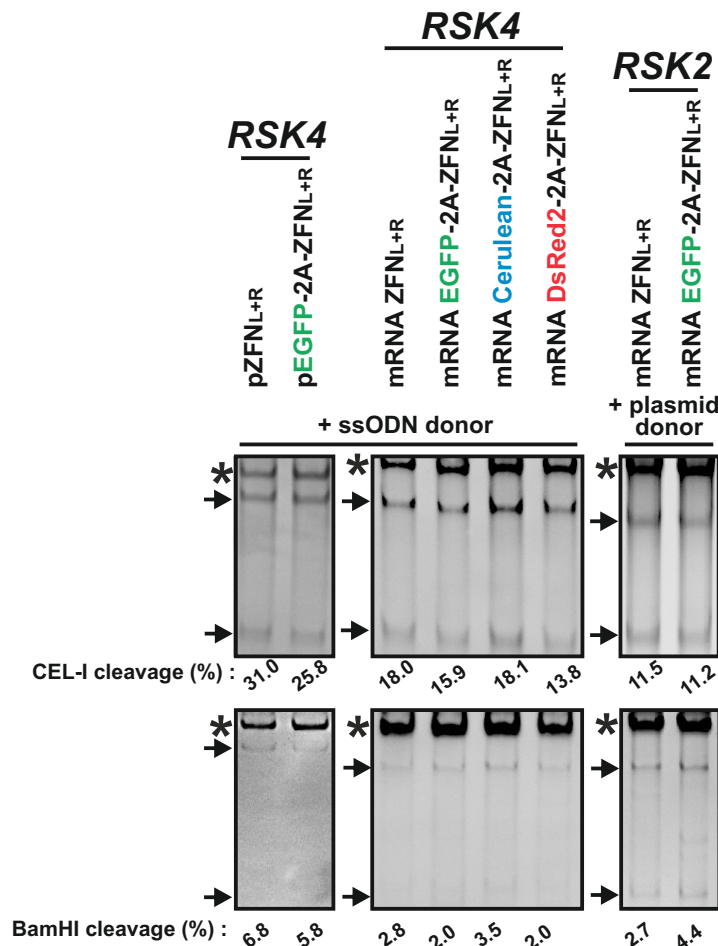

**Supplementary Figure S3. Fluo-2A-ZFN constructs delivered as plasmid or mRNA express ZFNs that function effectively.** K562 cells were transfected with pEGFP-2A-ZFN or pZFN for *RSK4* or with mRNA transcribed *in vitro* from pFluo-2A-ZFN encoding various fluorescent proteins or pZFN for *RSK4* or *RSK2*. An ssODN (*RSK4* Cys443Val/BamHI) or a plasmid (*RSK2* Cys436Val/BamHI) donor was co-transfected, as indicated, designed to introduce a codon-swap mutation and a diagnostic restriction endonuclease site in *RSK4* or *RSK2*. Three d post-transfection, the cells were lysed and genomic DNA was subjected to CEL-I or RFLP assay. PCR products containing amplicons derived from mutant alleles or from wild-type alleles only, are indicated by arrows and asterisk, respectively. The experiments were repeated several times with similar results. N.D., none detected.

# Supplementary Figure S4

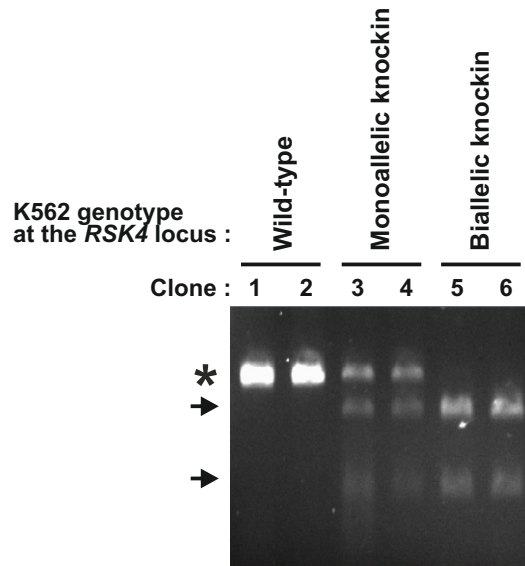

**Supplementary Figure S4. Example of RFLP identification of monoallelic and biallelic knockin modification of the *RSK4* locus.** Six clonal K562 cell lines derived from the experiment depicted in Figure 1E showing wild-type, monoallelic or biallelic knockin modification of the *RSK4* locus as revealed by RFLP analysis. Unmodified clones show a non-digested 1207 bp PCR product amplified from the wild-type alleles (indicated by an asterisk). Clones with monoallelic modification show a non-digested 1207 bp PCR product derived from the wild-type allele as well as 840 bp and 367 bp diagnostic fragments of PCR products amplified from the modified allele (indicated by arrows). Clones with biallelic modification only show the 840 bp and 367 bp diagnostic fragments of PCR products amplified from the modified alleles.

# Supplementary Figure S5

## A Fluorescent protein-2A-ZFN transfected cells

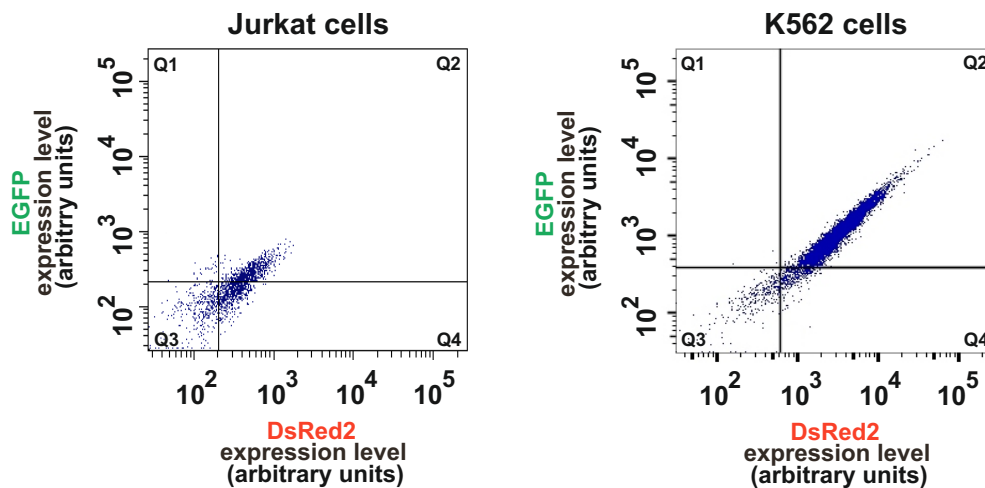

## B Mock-transfected cells

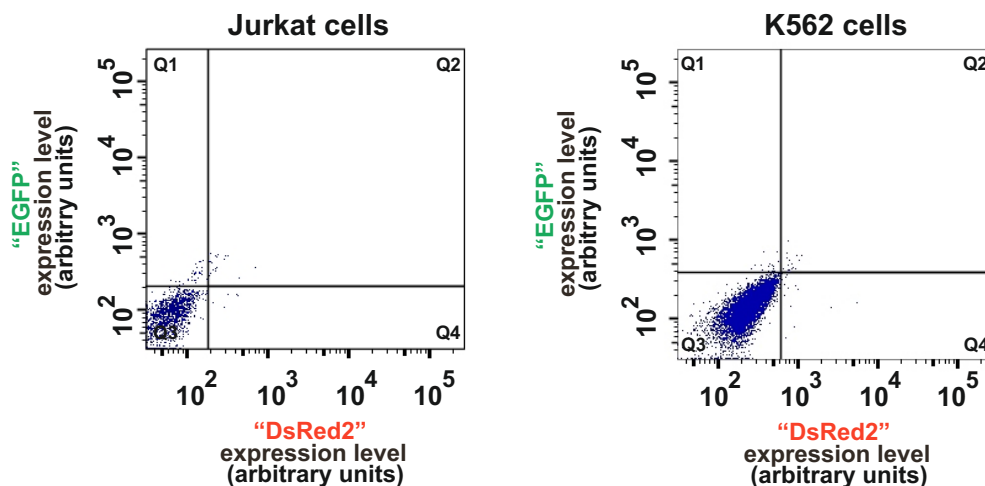

**Supplementary Figure S5. FACS profiles of Jurkat and K562 cells.** FACS profiles of Jurkat and K562 cells 3 d after transfection with mRNA for EGFP-2A-ZFNL and DsRed2-2A-ZFNR along with an ssODN knockin donor (*RSK4* Cys443Val/BamHI) (A) or 3 d after transfection with irrelevant mRNA not encoding fluorescent protein (B). The profiling in (B) helped define the fraction of cells (Q3) devoid of detectable fluorescence signal derived from the transfected constructs encoding EGFP or DsRed2. Based on this data, cell populations with specific EGFP signal (Q1), specific DsRed2 signal (Q4) or specific signals for both EGFP and DsRed2 (Q2) were assigned in the FACS profiles in (A).

# Supplementary Figure S6

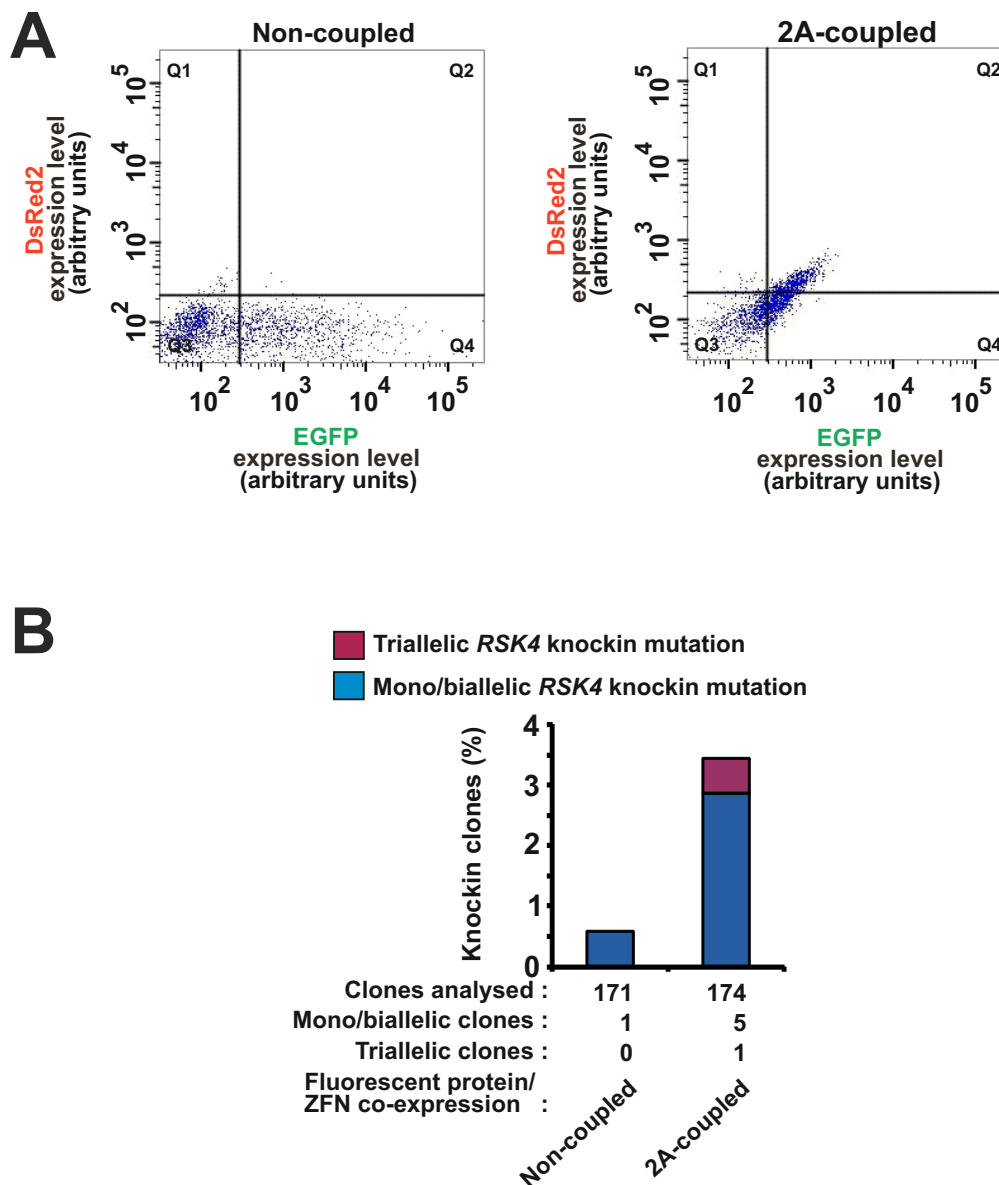

**Supplementary Figure S6. Non-coupled versus 2A-coupled co-expression of fluorescent proteins and ZFNs.** Jurkat cells were either transfected with mRNA for ZFN1 and ZFN2 along with a plasmid expressing EGFP (co-expression: non-coupled) or with mRNA for EGFP-2A-ZFN1 and DsRed2-2A-ZFN2 (co-expression: 2A-coupled). In both cases, the ZFNs targeted the *RSK4* locus and the ssODN donor *RSK4* Cys443Val/BamHI was co-transfected along with the ZFNs. **(A)** FACS profiles of the two cell populations 3 d after transfection. **(B)** Three d post-transfection, the two cell populations were sorted for EGFP and EGFP/DsRed2 fluorescence, respectively, cells were plated out singly, expanded to clones and analysed for mono/bi- or triallelic knockin at the *RSK4* locus. The data are summed from 3 independent experiments.

# Supplementary Figure S7

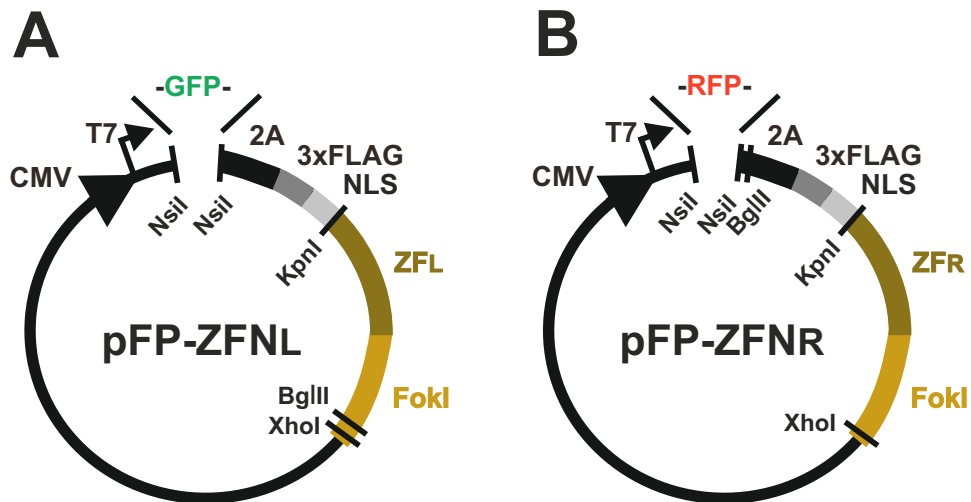

**Supplementary Figure S7. pFP-2A-ZFN constructs that can be converted into FP-ZFNL-ZFNR single vector constructs.** Schematic of pFP-ZFN constructs that couple ZFNL and ZFNR monomers of a pair to GFP and RFP, respectively. Fluorescent protein and ZFN can be exchanged by using the NsiI and KpnI/XhoI restriction sites, respectively. Furthermore, the ZFNL and ZFNR of the pair can be combined into a pFP-ZFNL-ZFNR single vector construct (Figure 3A) by using the BglII and XhoI sites present in both of the individual pFP-ZFN plasmids.



# Supplementary Figure S8

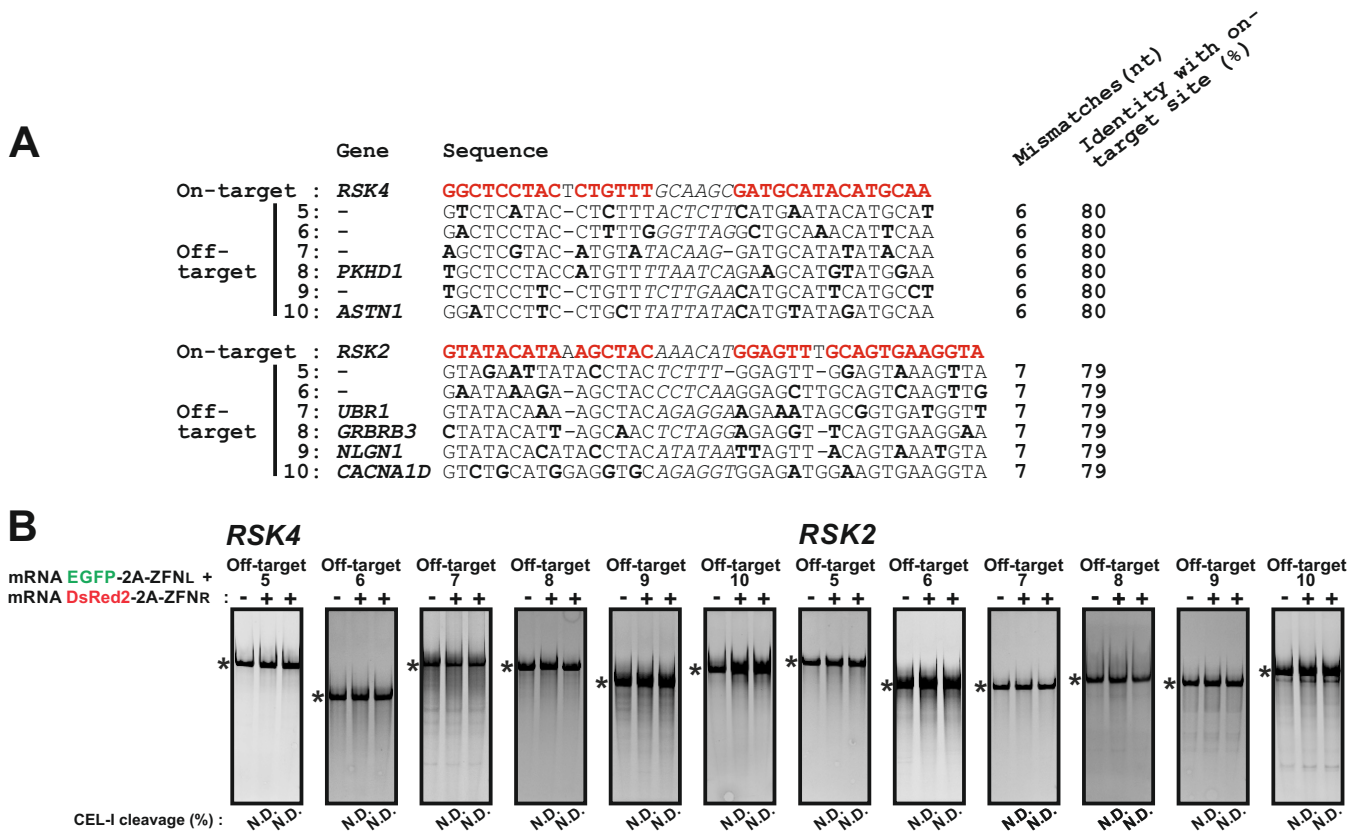

**Supplementary Figure S8. Off-target cutting associated with FACS for high ZFN levels in K562 cells.** (A) Sequence of the top-ranking candidate off-target sites 5-10 for *RSK4* and *RSK2* ZFNs. The on-target site is indicated in red and mismatches in off-target sites relative to the on-target site are boldface. The spacer sequence between the individual ZFN monomers is in italics. (B) K562 cells were transfected with EGFP-2A-ZFNL and DsRed2-2A-ZFNR for *RSK4* or *RSK2* along with ssODN donors for either gene. Three d later, genomic DNA was isolated from the 20% most highly fluorescent cell population and analysed by CEL-I assay for modification at the 6 off-target sites shown in (A). PCR products containing amplicons derived from mutant alleles and PCR products derived from wild-type alleles only, are indicated by arrows and asterisk, respectively. The experiment was repeated 3 times with similar results. N.D., none detected.

# Supplementary Figure S9

|              |                                                      |                                                                    | Mismatches (nt) | Identity with on-target site (%) | Clones with off-target mutation/ clones analysed |
|--------------|------------------------------------------------------|--------------------------------------------------------------------|-----------------|----------------------------------|--------------------------------------------------|
| On-target    | : <i>B3GNT2</i>                                      | <b>TTCAGCCCTTCC</b> <i>CGGGC</i> - <b>GTACTGGAACAGAGAGCA</b>       |                 |                                  |                                                  |
|              | 1 : <i>FAM117B</i>                                   | TTCAGTCCTTCCACACT-GT <b>TCC</b> GGAAC <b>CG</b> AGAGCC             | 5               | 83                               | 0/5                                              |
|              | 2 : -                                                | <b>ACCACAC</b> CTTCCCAGG-GTAC <b>AGG</b> AACAGAGT <b>GCA</b>       | 6               | 80                               | 0/5                                              |
|              | Off-target 3 : -                                     | CTCAGCTCTTCCCTCTAGCACTGGCACA <b>AA</b> AGAGGA                      | 6               | 80                               | 0/5                                              |
|              | 4 : -                                                | CT <b>AGG</b> CCCTTCCC <b>ATT</b> TGTCTTGGCAGAGAGAGCA              | 6               | 80                               | 0/5                                              |
| 5 : -        | CTGGGCCCTTCCC <b>AT</b> GTGT <b>CC</b> AGGACAGAGAGCA | 6                                                                  | 80              | 0/5                              |                                                  |
| On-target    | : <i>B4GALT2</i>                                     | <b>CAGCCCCGCCACTTT</b> <i>GCCATCGCCATGGAC</i> <b>AGTTTGGCT</b>     |                 |                                  |                                                  |
| Off-target 1 | : <i>1B4GALT1</i>                                    | CAGCCCCGGCAC <b>ATT</b> TCTGTGCA <b>A</b> TGGACAAGTTTGGGT          | 4               | 88                               | 0/2                                              |
| On-target    | : <i>B3GNT1</i>                                      | <b>TGCAGCTGCTCTACCTGTC</b> <i>GCTGC</i> <b>TCTCCGGACTGCACG</b>     |                 |                                  |                                                  |
| Off-target 1 | : <i>1ZFP263</i>                                     | TGCAGCGTCTCCACCTG <b>AC</b> CGGCTTCTC <b>AGG</b> CCGCACA           | 8               | 76                               | 0/5                                              |
| On-target    | : <i>B4GALT4</i>                                     | <b>AACTGGGACTGCTTT</b> <i>ATATTCCACGATGTGGACCTGGTG</i>             |                 |                                  |                                                  |
| Off-target 1 | : <i>B4GALT3</i>                                     | <b>GA</b> ATGGGACTGCTT <b>GTT</b> CTTACATGATGTGGACCT <b>CCT</b>    | 7               | 79                               | 1/5                                              |
| Off-target 2 | : -                                                  | C <b>ACT</b> GGGAGT <b>GATT</b> GTGAGC-CACA <b>AT</b> GTGGAGCTGGGA | 8               | 76                               | 0/5                                              |
| Off-target 3 | : -                                                  | G <b>ATT</b> GGGCTCCTTTGAGGT-CATGATGCTGACCT <b>TTG</b>             | 8               | 76                               | 0/5                                              |

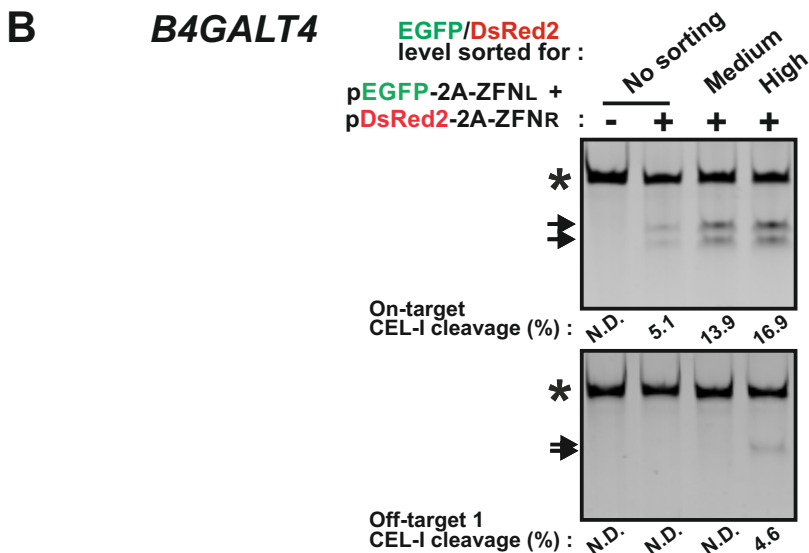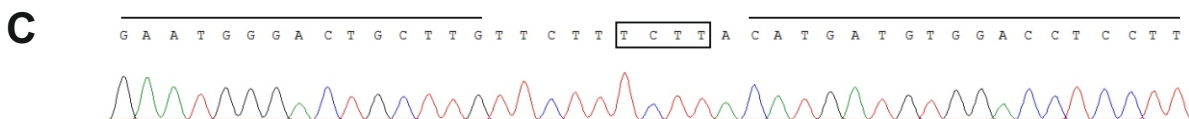

**Supplementary Figure S9. Off-target cutting in CHO clones established using FACS isolation of cells with high ZFN levels.** (A) CHO clones with biallelic, NHEJ-derived knockout of various genes were established by transfection with the appropriate EGFP-2A-ZFNL and DsRed2-2A-ZFNR constructs followed by FACS isolation for the top-2 to -18% most highly double-fluorescent cells and single-cell plating for clonal expansion. Derived clones were analysed for mutations in top-ranking, candidate off-target sites by Sanger sequencing. Only one monoallelic mutation was identified: a 4bp insertion (shown in C) in off-target 1 in a clone modified by *B4GALT4* ZFNs. The ZFN on-target site is indicated in red and mismatches in off-target sites relative to the target site are boldface. The spacer sequence between the individual ZFN monomers is in italics. (B) CHO cells were transfected with plasmid expressing EGFP-2A-ZFNL and DsRed2-2A-ZFNR for *B4GALT4*. Three d later, genomic DNA was isolated from non-sorted cells or from cells FACS isolated for medium or high fluorescence intensities and analysed by CEL-I assay for modification of off-target site 1 in *B4GALT3*. PCR products containing amplicons derived from mutant alleles and PCR products derived from wild-type alleles only, are indicated by arrows and asterisk, respectively. The experiment was repeated 3 times with similar results. N.D., none detected. (C) Genomic sequence of the monoallelic mutation in *B4GALT4* off-target 1 (isolated by TOPO cloning), indicating the 4 bp insertion (boxed) and the ZFN binding sites (black bars).

# Supplementary Figure S10

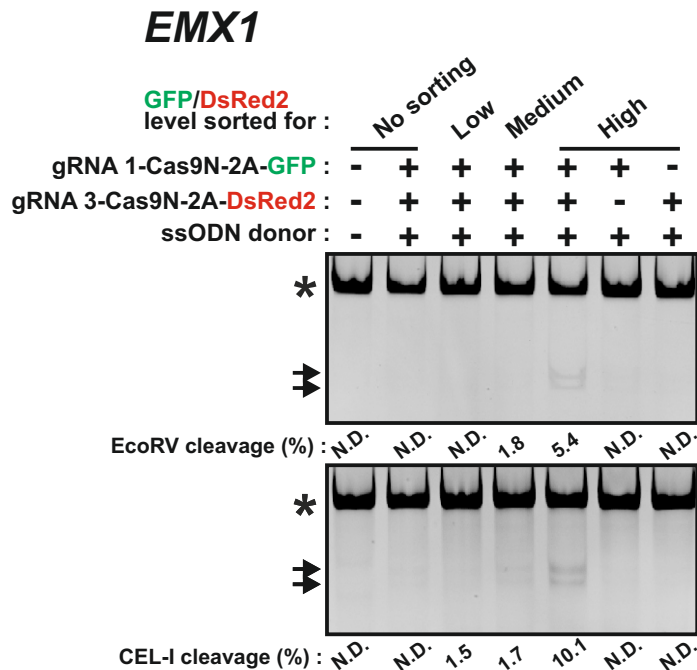

**Supplementary Figure S10. Genome editing by CRISPR/Cas9 nickase pairs is enhanced by using the 2A-coupled fluorescent protein/FACS strategy.** K562 cells were transfected with Cas9N-FP constructs targeting the *EMX1* locus as a nickase pair or as individual nickases coupled to GFP or dsRed2, as indicated. An ssODN donor (*EMX1* gRNA 1/3 EcoRV) for knockin of an EcoRV restriction site in *EMX1* was co-transfected. Three d after transfection, genomic DNA was isolated from non-sorted cells or from cells FACS isolated for low, medium or high GFP/dsRed2 double-fluorescence intensities and analysed by RFLP or CEL-I assay, as indicated. In all experiments, repeated 3 times with similar results, PCR products containing amplicons derived from mutant alleles or from wild-type alleles only, are indicated by arrows and asterisk, respectively. N.D., none detected.
